# Supplementary material for: Neoadjuvant PD-1 Blockade Combined With Chemotherapy Followed by Concurrent Immunoradiotherapy in Locally Advanced Anal Canal Squamous Cell Carcinoma Patients: Antitumor Efficacy, Safety and Biomarker Analysis
Source: Front Immunol. 2022 Jan 14;12:798451. doi: 10.3389/fimmu.2021.798451 (PMC8794813; doi:10.3389/fimmu.2021.798451)
Supplement: Supplementary file 3 [file Table_1.xlsx]

## Sheet: Sheet1
Supplementary Table 1. Whole exome sequencing information for five ACSC patients
Sample	Pt1T	Pt1N	Pt2T	Pt2N	Pt3N	Pt3T	Pt4N	Pt4T	Pt5N
[Total] Raw Reads (All reads)	346526197	476463584	119627663	386410399	165912144	196102373	128059964	588069410	284959999
[Total] QC Fail reads	0	0	0	0	0	0	0	0	0
[Total] Raw Data(Mb)	51787.2	70879.8	17895.7	57580.6	24822.9	28065.3	19168.5	77360.9	42602.5
[Total] Paired Reads	344539884	470360792	119129166	382478434	165252784	182281548	127641918	470000000	283499736
[Total] Mapped Reads	343879118	469286019	118968326	381696921	165067227	180890421	127559259	468791250	282589685
[Total] Fraction of Mapped Reads	0.9924	0.9849	0.9945	0.9878	0.9949	0.9224	0.9961	0.7972	0.9917
[Total] Mapped Data(Mb)	51581.9	70392.9	17845.2	57254.5	24760.1	27133.6	19133.9	70787.5	42388.4
[Total] Fraction of Mapped Data(Mb)	0.996	0.9931	0.9972	0.9943	0.9975	0.9668	0.9982	0.915	0.995
[Total] Properly paired	339862374	461473610	117880256	376817690	163555524	173786280	126595553	422655962	279441872
[Total] Fraction of Properly paired	0.9808	0.9685	0.9854	0.9752	0.9858	0.8862	0.9886	0.7187	0.9806
[Total] Read and mate paired	343503478	468633374	118888726	381355784	164973290	180505940	127476600	468080182	282297394
[Total] Fraction of Read and mate paired	0.9913	0.9836	0.9938	0.9869	0.9943	0.9205	0.9954	0.796	0.9907
[Total] Singletons	375640	652645	79600	341137	93937	384481	82659	711068	292291
[Total] Read and mate map to diff chr	2976320	6073034	775272	3813772	1160658	3511404	678795	37557610	2307356
[Total] Read1	172269942	235180396	59564583	191239217	82626392	91140774	63818109	235000000	141749868
[Total] Read2	172269942	235180396	59564583	191239217	82626392	91140774	63823809	235000000	141749868
[Total] Read1(rmdup)	148619252	203555141	55259136	168239738	77160700	76295431	58783674	173452384	123079438
[Total] Read2(rmdup)	148559548	203429511	55240403	168189063	77142286	76271928	58773013	173348136	123059125
[Total] forward strand reads	171927620	234617648	59473446	190773726	82518038	90405858	63764926	234401042	141221304
[Total] backward strand reads	171951498	234668371	59494880	190923195	82549189	90484563	63794333	234390208	141368381
[Total] PCR duplicate reads	46700318	62301367	8468787	45268120	10764241	28323062	10002572	121990730	36451122
[Total] Fraction of PCR duplicate reads	0.1358	0.1328	0.0712	0.1186	0.0652	0.1566	0.0784	0.2602	0.129
[Total] Map quality cutoff value	20	20	20	20	20	20	20	20	20
[Total] MapQuality above cutoff reads	318000597	435720998	109494187	351245690	152391388	174253754	116361401	499549487	258762875
[Total] Fraction of MapQ reads in all reads	0.9177	0.9145	0.9153	0.909	0.9185	0.8886	0.9086	0.8495	0.9081
[Total] Fraction of MapQ reads in mapped reads	0.9247	0.9285	0.9204	0.9202	0.9232	0.9633	0.9122	1.0656	0.9157
[Target] Target Reads	260343507	352800113	91219790	303614230	127480916	146250618	102916484	345549788	217941733
[Target] Fraction of Target Reads in all reads	0.7513	0.7405	0.7625	0.7857	0.7684	0.7458	0.8037	0.5876	0.7648
[Target] Fraction of Target Reads in mapped reads	0.7571	0.7518	0.7668	0.7954	0.7723	0.8085	0.8068	0.7371	0.7712
[Target] Target Data(Mb)	26871.8	35875.5	9429.65	31029.9	13091.3	15268.4	10500	34743.2	22458.1
[Target] Target Data Rmdup(Mb)	21742.1	29252.7	8190.78	25699.5	11510.1	12096	9105.92	23032.7	18361
[Target] Fraction of Target Data in all data	0.5189	0.5061	0.5269	0.5389	0.5274	0.544	0.5478	0.4491	0.5272
[Target] Fraction of Target Data in mapped data	0.521	0.5096	0.5284	0.542	0.5287	0.5627	0.5488	0.4908	0.5298
[Target] Len of region	39501604	39501604	39501604	39501604	39501604	39501604	39501604	39501604	39501604
[Target] Average depth	680.27	908.2	238.72	785.54	331.41	386.53	265.81	879.54	568.54
[Target] Average depth(rmdup)	550.41	740.54	207.35	650.59	291.38	306.22	230.52	583.08	464.82
[Target] Coverage (>0x)	0.998	0.9984	0.9977	0.9983	0.9976	0.998	0.8199	0.9983	0.9992
[Target] Coverage (>=4x)	0.9973	0.9975	0.9968	0.9974	0.9969	0.9971	0.8196	0.9975	0.9989
[Target] Coverage (>=10x)	0.9967	0.9969	0.9959	0.9968	0.9962	0.9964	0.8191	0.9969	0.9985
[Target] Coverage (>=30x)	0.9959	0.9962	0.9922	0.996	0.9941	0.995	0.8177	0.9961	0.9976
[Target] Coverage (>=100x)	0.9915	0.9937	0.8648	0.9922	0.9536	0.9577	0.7914	0.9914	0.9898
[Target] Target Region Count	215480	215480	215480	215480	215480	215480	215480	215480	215480
[Target] Region covered > 0x	214973	215069	214877	215045	214852	214914	169352	215032	215285
[Target] Fraction Region covered > 0x	0.9976	0.9981	0.9972	0.998	0.9971	0.9974	0.7859	0.9979	0.9991
[Target] Fraction Region covered >= 4x	0.9966	0.9969	0.9959	0.9968	0.9961	0.9963	0.7853	0.9968	0.9986
[Target] Fraction Region covered >= 10x	0.996	0.9962	0.9947	0.996	0.9952	0.9953	0.7847	0.9961	0.998
[Target] Fraction Region covered >= 30x	0.9946	0.9951	0.9906	0.9948	0.9926	0.9933	0.783	0.9949	0.9965
[Target] Fraction Region covered >= 100x	0.9893	0.9916	0.8841	0.9901	0.9571	0.962	0.761	0.9904	0.9886
[flank] flank size	200	200	200	200	200	200	200	200	200
[flank] Len of region (not include target region)	74999139	74999139	74999139	74999139	74999139	74999139	74999139	74999139	74999139
[flank] Average depth	168.35	246.24	56.45	200.69	85	76.02	68.23	174.24	132.76
[flank] flank Reads	202947454	282906619	69540217	238140618	100164650	104468521	81941647	241214955	166910862
[flank] Fraction of flank Reads in all reads	0.5857	0.5938	0.5813	0.6163	0.6037	0.5327	0.6399	0.4102	0.5857
[flank] Fraction of flank Reads in mapped reads	0.5902	0.6028	0.5845	0.6239	0.6068	0.5775	0.6424	0.5145	0.5906
[flank] flank Data(Mb)	12625.8	18467.6	4233.97	15051.6	6374.97	5701.7	5116.86	13068.1	9956.89
[flank] Fraction of flank Data in all data	0.2438	0.2605	0.2366	0.2614	0.2568	0.2032	0.2669	0.1689	0.2337
[flank] Fraction of flank Data in mapped data	0.2448	0.2624	0.2373	0.2629	0.2575	0.2101	0.2674	0.1846	0.2349
[flank] Coverage (>0x)	0.9937	0.9967	0.9667	0.9945	0.989	0.9398	0.8192	0.9823	0.9899
[flank] Coverage (>=4x)	0.9654	0.9917	0.8397	0.9744	0.9337	0.7965	0.757	0.9151	0.9332
[flank] Coverage (>=10x)	0.8687	0.9631	0.6679	0.9028	0.7958	0.6418	0.6377	0.7879	0.8033
[flank] Coverage (>=30x)	0.6718	0.8101	0.4515	0.7192	0.563	0.4591	0.4569	0.5988	0.6017
[flank] Coverage (>=100x)	0.4363	0.5457	0.1729	0.4729	0.2755	0.2335	0.232	0.3937	0.3709
